# Supplementary material for: Electrospun Magnetic Ionic Liquid Based Electroactive Materials for Tissue Engineering Applications
Source: MDPI journal article supplement (doi:10.3390/nano12173072), 2022-09-04
Supplement: s1 [file s1]

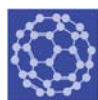

## Supplementary Information

# Electrospun Magnetic Ionic Liquid Based Electroactive Materials for Tissue Engineering Applications

Liliana . Fernandes <sup>1,2</sup>, Rafaela M. Meira <sup>1,2,3</sup>, Daniela M. Correia <sup>4,\*</sup>, Clarisse Ribeiro <sup>1,2</sup>, Eduardo Fernandez <sup>5</sup>, Carmen R. Tubio <sup>5</sup> and Senentxu Lanceros-Méndez <sup>5,6,\*</sup>

<sup>1</sup> Physics Centre of Minho and Porto Universities (CF-UM-UP), University of Minho, 4710-057 Braga, Portugal

<sup>2</sup> LaPMET-Laboratory of Physics for Materials and Emergent Technologies, University of Minho, 4710-057 Braga, Portugal

<sup>3</sup> IB-S-Institute of Science and Innovation for Sustainability, University of Minho, 4710-057 Braga, Portugal

<sup>4</sup> Centre of Chemistry, University of Minho, 4710-057 Braga, Portugal

<sup>5</sup> BCMaterials, Basque Center for Materials, Applications and Nanostructures, UPV/EHU Science Park, 48940 Leioa, Spain

<sup>6</sup> IKERBASQUE, Basque Foundation for Science, 48013 Bilbao, Spain

\* Correspondence: dcorreia@quimica.uminho.pt (D.M.C.); senentxu.lanceros@bcmaterials.net (S.L.-M)

**Table S1.** Electrospinning processing parameters.

| Electrospinning processing parameters |                        |
|---------------------------------------|------------------------|
| Distance between needle and collector | 20 cm                  |
| Applied voltage                       | 14 kV                  |
| Feed rate                             | 0.4 mL h <sup>-1</sup> |
| Needle diameter                       | 0.5 mm                 |
| Collector velocity                    | 1500 rpm               |
| Relative humidity                     | 40 % - 60 %            |
| Temperature                           | 25 °C                  |
